# Supplementary material for: Whole body synthesis rates of DHA from α-linolenic acid are greater than brain DHA accretion and uptake rates in adult rats
Source: PubMed Central journal article supplement (PMC3927474; doi:10.1194/jlr.m042275), 2014-01
Supplement: supp_M042275_jlr.M042275-1.pdf [file supp_M042275_jlr.M042275-1.pdf]

**Supplementary Table 1: Summary of n-6 PUFA balance**

| Dietary Group:                               | Control (n=10)         | ALA (n=10)              | DHA (n=10)             |
|----------------------------------------------|------------------------|-------------------------|------------------------|
| Intake of LNA (μmol)                         | 190055 ± 5097          | 175479 ± 5456           | 189164 ± 6855          |
| Fecal Excretion of LNA (μmol)                | 950 ± 25               | 877 ± 27                | 946 ± 34               |
| Body Content of n-6 PUFA (μmol)              |                        |                         |                        |
| Day 0                                        | 1491 ± 35              | 1491 ± 35               | 1491 ± 35              |
| Day 105                                      | 35231 ± 1639           | 29170 ± 2846            | 32391 ± 2116           |
| Brain Content of n-6 PUFA (μmol)             |                        |                         |                        |
| Day 0                                        | 14 ± 0.6               | 14 ± 0.6                | 14 ± 0.6               |
| Day 105                                      | 24 ± 0.9               | 20 ± 0.9                | 17 ± 0.9               |
| Total Accretion (μmol)                       |                        |                         |                        |
| LNA                                          | 30313 ± 2029           | 25157 ± 2808            | 28810 ± 3054           |
| 18:3n-6                                      | 57 ± 5                 | 52 ± 5                  | 41 ± 5                 |
| 20:2n-6                                      | 181 ± 19               | 169 ± 14                | 167 ± 17               |
| ARA                                          | 2132 ± 97 <sup>a</sup> | 1806 ± 93 <sup>ab</sup> | 1539 ± 85 <sup>b</sup> |
| 22:4n-6                                      | 188 ± 13 <sup>a</sup>  | 138 ± 12 <sup>a</sup>   | 97 ± 12 <sup>b</sup>   |
| DPA n-6                                      | 751 ± 16 <sup>a</sup>  | 168 ± 9 <sup>b</sup>    | 67 ± 13 <sup>c</sup>   |
| Total                                        | 33621 ± 1631           | 27489 ± 2843            | 30720 ± 2111           |
| Metabolic consumption of dietary PUFA (μmol) | 155702 ± 4279          | 147161 ± 5213           | 157517 ± 5519          |

Data are means ± SEM, different letters signify means are significantly different (p<0.05) measured by One-Way ANOVA followed by Tukey's test for multiple comparisons
