# Supplementary material for: Whole body synthesis rates of DHA from α-linolenic acid are greater than brain DHA accretion and uptake rates in adult rats
Source: PubMed Central journal article supplement (PMC3927474; doi:10.1194/jlr.m042275), 2014-01
Supplement: supp_M042275_jlr.M042275-2.pdf [file supp_M042275_jlr.M042275-2.pdf]

Supplementary Table 2: Whole body fatty acids for rats fed the control, ALA or DHA diet for 15 weeks

| Fatty Acid    | Control |                   | ALA   |                    | DHA   |                   |
|---------------|---------|-------------------|-------|--------------------|-------|-------------------|
| 12:0          | 26353   | ± 1935            | 23532 | ± 2238             | 23339 | ± 2308            |
| 14:0          | 19223   | ± 1126            | 17606 | ± 1277             | 18211 | ± 1610            |
| 14:1n-7       | 1507    | ± 97              | 1331  | ± 109              | 1280  | ± 130             |
| 16:0          | 51757   | ± 3778            | 44604 | ± 3897             | 51092 | ± 5729            |
| 16:1n-7       | 18719   | ± 1581            | 16111 | ± 1454             | 17497 | ± 2287            |
| 18:0          | 6703    | ± 327             | 6101  | ± 299              | 6863  | ± 483             |
| 18:1n-9       | 45830   | ± 3338            | 38781 | ± 3325             | 40657 | ± 4800            |
| 18:1n-7       | 8998    | ± 674             | 7553  | ± 583              | 7340  | ± 739             |
| 18:2n-6       | 31605   | ± 1554            | 29104 | ± 1667             | 30102 | ± 2055            |
| 18:3n-6       | 73      | ± 5               | 67    | ± 5                | 56    | ± 5               |
| 18:3n-3       | 89      | ± 6 <sup>a</sup>  | 1557  | ± 99 <sup>b</sup>  | 93    | ± 7 <sup>a</sup>  |
| 20:1n-9       | 201     | ± 16              | 189   | ± 14               | 176   | ± 17              |
| 20:2          | 206     | ± 19              | 194   | ± 13               | 192   | ± 20              |
| 20:3n-3       | 112     | ± 7 <sup>a</sup>  | 137   | ± 11 <sup>ab</sup> | 192   | ± 21 <sup>b</sup> |
| ARA (20:4n-6) | 2280    | ± 98 <sup>a</sup> | 1954  | ± 93 <sup>ab</sup> | 1688  | ± 44 <sup>b</sup> |
| EPA (20:5n-3) | 55      | ± 3 <sup>a</sup>  | 76    | ± 9 <sup>b</sup>   | 80    | ± 8 <sup>b</sup>  |
| 22:4n-6       | 205     | ± 16 <sup>a</sup> | 155   | ± 12 <sup>ab</sup> | 115   | ± 6 <sup>b</sup>  |
| 22:5n-6       | 533     | ± 21 <sup>a</sup> | 124   | ± 6 <sup>b</sup>   | 52    | ± 3 <sup>c</sup>  |
| 22:5n-3       | 19      | ± 2 <sup>a</sup>  | 101   | ± 7 <sup>b</sup>   | 80    | ± 7 <sup>b</sup>  |
| DHA (22:6n-3) | 106     | ± 6 <sup>a</sup>  | 481   | ± 40 <sup>b</sup>  | 1160  | ± 63 <sup>c</sup> |

Data are expressed in  $\mu\text{mol}$ , as mean  $\pm$  SEM. Different letters signify the means are significantly different ( $p < 0.05$ ) measured by One-way ANOVA followed by Tukey's test for multiple comparisons or Kruskal-Wallis test followed by Dunn's multiple comparison test (if variances were significantly different).
