# Supplementary material for: Whole body synthesis rates of DHA from α-linolenic acid are greater than brain DHA accretion and uptake rates in adult rats
Source: PubMed Central journal article supplement (PMC3927474; doi:10.1194/jlr.m042275), 2014-01
Supplement: supp_M042275_jlr.M042275-3.pdf [file supp_M042275_jlr.M042275-3.pdf]

Supplementary Table 3. Cortex fatty acid concentrations for rats fed the control, ALA and DHA diets for 15 weeks

| Fatty Acid    | Control (n=11)          | ALA (n=11)              | DHA (n=11)              |
|---------------|-------------------------|-------------------------|-------------------------|
| 14:0          | 186 ± 6                 | 176 ± 5                 | 191 ± 6                 |
| 16:0          | 18857 ± 341             | 18295 ± 216             | 18552 ± 417             |
| 16:1n-7       | 313 ± 33                | 351 ± 34                | 361 ± 35                |
| 18:0          | 17286 ± 412             | 17115 ± 223             | 17319 ± 262             |
| 18:1n-9       | 14247 ± 374             | 14618 ± 330             | 14642 ± 760             |
| 18:1 n-7      | 2744 ± 62               | 2651 ± 55               | 2670 ± 61               |
| 18:2n-6       | 309 ± 9 <sup>a</sup>    | 379 ± 10 <sup>b</sup>   | 464 ± 15 <sup>c</sup>   |
| 20:0          | 199 ± 11                | 214 ± 8                 | 221 ± 9                 |
| 20:1n-9       | 801 ± 27                | 846 ± 33                | 848 ± 73                |
| 20:2          | 81 ± 4                  | 74 ± 8                  | 85 ± 3                  |
| 20:3n-3       | 109 ± 7 <sup>a</sup>    | 150 ± 7 <sup>b</sup>    | 195 ± 10 <sup>c</sup>   |
| ARA (20:4n-6) | 6440 ± 222              | 6607 ± 217              | 6344 ± 197              |
| EPA (20:5n-3) | 196 ± 9                 | 212 ± 10                | 223 ± 14                |
| 22:1n-9       | 104 ± 47                | 58 ± 4                  | 67 ± 9                  |
| 22:4n-6       | 1849 ± 66 <sup>a</sup>  | 1745 ± 59 <sup>a</sup>  | 1525 ± 50 <sup>b</sup>  |
| 22:5 n-6      | 2719 ± 124 <sup>a</sup> | 275 ± 18 <sup>b</sup>   | 76 ± 6 <sup>c</sup>     |
| 24:1n-9       | 335 ± 14 <sup>a</sup>   | 380 ± 15 <sup>ab</sup>  | 403 ± 20 <sup>b</sup>   |
| 22:5 n-3      | 20 ± 2 <sup>a</sup>     | 57 ± 4 <sup>b</sup>     | 68 ± 4 <sup>b</sup>     |
| DHA (22:6n-3) | 3980 ± 232 <sup>a</sup> | 7096 ± 407 <sup>b</sup> | 7730 ± 379 <sup>b</sup> |

Data shown are means +/- SEM and are expressed in nmol/g of brain. Different letters signify the means are significantly different ( $p < 0.05$ ) measured by One-way ANOVA followed by Tukey's test for multiple comparisons or Kruskal-Wallis test followed by Dunn's multiple comparison test (if variances were significantly different).
