# Supplementary material for: Whole body synthesis rates of DHA from α-linolenic acid are greater than brain DHA accretion and uptake rates in adult rats
Source: PubMed Central journal article supplement (PMC3927474; doi:10.1194/jlr.m042275), 2014-01
Supplement: supp_M042275_jlr.M042275-4.pdf [file supp_M042275_jlr.M042275-4.pdf]

Supplementary Table 4. Cerebellum fatty acid concentrations for rats fed the control, ALA or DHA diet for 15 weeks

| Fatty Acid    | Control (n=11)          | ALA (n=11)               | DHA (n=11)              |
|---------------|-------------------------|--------------------------|-------------------------|
| 14:0          | 187 ± 21                | 216 ± 8                  | 233 ± 12                |
| 16:0          | 20542 ± 538             | 20382 ± 839              | 20035 ± 246             |
| 16:1n-7       | 324 ± 22                | 447 ± 56                 | 315 ± 43                |
| 18:0          | 19206 ± 625             | 19468 ± 800              | 19542 ± 444             |
| 18:1n-9       | 19343 ± 757             | 20097 ± 982              | 22498 ± 1295            |
| 18:1n-7       | 4803 ± 130              | 4770 ± 181               | 4901 ± 129              |
| 18:2n-6       | 681 ± 39 <sup>a</sup>   | 804 ± 32 <sup>ab</sup>   | 1025 ± 74 <sup>b</sup>  |
| 20:0          | 547 ± 27                | 581 ± 27                 | 626 ± 55                |
| 20:1n-9       | 2255 ± 91 <sup>a</sup>  | 2410 ± 200 <sup>ab</sup> | 2838 ± 247 <sup>b</sup> |
| 20:2n-6       | 212 ± 10                | 228 ± 7                  | 251 ± 15                |
| 20:3n-3       | 294 ± 12 <sup>a</sup>   | 320 ± 14 <sup>a</sup>    | 374 ± 17 <sup>b</sup>   |
| ARA (20:4n-6) | 6744 ± 225              | 6304 ± 255               | 5971 ± 159              |
| EPA (20:5n-3) | 454 ± 21                | 507 ± 34                 | 566 ± 59                |
| 22:1n-9       | 196 ± 12                | 200 ± 14                 | 199 ± 12                |
| 22:4n-6       | 2469 ± 85 <sup>a</sup>  | 1899 ± 67 <sup>b</sup>   | 1598 ± 58 <sup>c</sup>  |
| 22:5n-6       | 3187 ± 143 <sup>a</sup> | 214 ± 15 <sup>b</sup>    | 57 ± 6 <sup>c</sup>     |
| 24:1n-9       | 660 ± 22                | 718 ± 31                 | 810 ± 76                |
| 22:5n-3       | 26 ± 1 <sup>a</sup>     | 77 ± 3 <sup>b</sup>      | 99 ± 5 <sup>b</sup>     |
| DHA (22:6n-3) | 5958 ± 309 <sup>a</sup> | 7943 ± 483 <sup>b</sup>  | 9032 ± 328 <sup>b</sup> |

Data shown are means +/- SEM and are expressed in nmol/g of brain. Different letters signify the means are significantly different ( $p < 0.05$ ) measured by One-way ANOVA followed by Tukey's test for multiple comparisons or Kruskal-Wallis test followed by Dunn's multiple comparison test (if variances were significantly different).
