# Supplementary material for: Whole body synthesis rates of DHA from α-linolenic acid are greater than brain DHA accretion and uptake rates in adult rats
Source: PubMed Central journal article supplement (PMC3927474; doi:10.1194/jlr.m042275), 2014-01
Supplement: supp_M042275_jlr.M042275-5.pdf [file supp_M042275_jlr.M042275-5.pdf]

Supplementary Table 5. Striatum fatty acid concentrations for rats fed the control, ALA or DHA diet for 15 weeks

| Fatty Acid    | Control (n=11)          | ALA (n=11)               | DHA (n=11)               |
|---------------|-------------------------|--------------------------|--------------------------|
| 14:0          | 297 ± 30                | 251 ± 21                 | 304 ± 33                 |
| 16:0          | 23013 ± 769             | 21970 ± 705              | 22887 ± 678              |
| 16:1n-7       | 386 ± 43                | 433 ± 29                 | 481 ± 16                 |
| 18:0          | 25623 ± 910             | 25048 ± 866              | 25703 ± 540              |
| 18:1n-9       | 22958 ± 1049            | 21774 ± 984              | 23876 ± 648              |
| 18:1n-7       | 4491 ± 172              | 4189 ± 167               | 4362 ± 100               |
| 18:2n-6       | 492 ± 24 <sup>a</sup>   | 561 ± 27 <sup>a</sup>    | 684 ± 25 <sup>b</sup>    |
| 20:0          | 471 ± 35                | 407 ± 24                 | 437 ± 18                 |
| 20:1n-9       | 1882 ± 120              | 1665 ± 98                | 1873 ± 98                |
| 20:2          | 127 ± 9                 | 111 ± 8                  | 123 ± 7                  |
| 20:3n-3       | 245 ± 13 <sup>a</sup>   | 249 ± 19 <sup>a</sup>    | 356 ± 21 <sup>b</sup>    |
| ARA (20:4n-6) | 10044 ± 511             | 9408 ± 547               | 9410 ± 389               |
| EPA (20:5n-3) | 578 ± 50                | 479 ± 32                 | 499 ± 48                 |
| 22:1n-9       | 288 ± 24 <sup>a</sup>   | 147 ± 16 <sup>b</sup>    | 339 ± 39 <sup>a</sup>    |
| 22:4n-6       | 2755 ± 145 <sup>a</sup> | 2387 ± 145 <sup>ab</sup> | 2196 ± 95 <sup>b</sup>   |
| 22:5n-6       | 3356 ± 180 <sup>a</sup> | 331 ± 24 <sup>b</sup>    | 89 ± 6 <sup>c</sup>      |
| 24:1n-9       | 716 ± 55                | 643 ± 47                 | 732 ± 52                 |
| 22:5n-3       | 15 ± 2 <sup>a</sup>     | 54 ± 3 <sup>b</sup>      | 60 ± 5 <sup>b</sup>      |
| DHA (22:6n-3) | 6395 ± 377 <sup>a</sup> | 8698 ± 742 <sup>b</sup>  | 10415 ± 632 <sup>b</sup> |

Data shown are means +/- SEM and are expressed in nmol/g of brain. Different letters signify the means are significantly different ( $p < 0.05$ ) measured by One-way ANOVA followed by Tukey's test for multiple comparisons or Kruskal-Wallis test followed by Dunn's multiple comparison test (if variances were significantly different).
