# Supplementary material for: Whole body synthesis rates of DHA from α-linolenic acid are greater than brain DHA accretion and uptake rates in adult rats
Source: PubMed Central journal article supplement (PMC3927474; doi:10.1194/jlr.m042275), 2014-01
Supplement: supp_M042275_jlr.M042275-6.pdf [file supp_M042275_jlr.M042275-6.pdf]

Supplementary Table 6. Hippocampus fatty acid concentrations for rats fed the control, ALA or DHA diet for 15 weeks

| Fatty Acid    | Control (n=11)          | ALA (n=11)              | DHA (n=11)              |
|---------------|-------------------------|-------------------------|-------------------------|
| 14:0          | 190 ± 18                | 185 ± 11                | 177 ± 14                |
| 16:0          | 20923 ± 482             | 20779 ± 535             | 20484 ± 601             |
| 16:1n-7       | 328 ± 13                | 335 ± 18                | 337 ± 26                |
| 18:0          | 20404 ± 466             | 20544 ± 673             | 20431 ± 609             |
| 18:1n-9       | 16727 ± 622             | 17927 ± 852             | 17851 ± 518             |
| 18:1n-7       | 3065 ± 94               | 3029 ± 130              | 2923 ± 72               |
| 18:2n-6       | 346 ± 20 <sup>a</sup>   | 402 ± 15 <sup>a</sup>   | 483 ± 29 <sup>b</sup>   |
| 20:0          | 264 ± 12                | 278 ± 19                | 257 ± 9                 |
| 20:1n-9       | 888 ± 54                | 915 ± 67                | 891 ± 35                |
| 20:2          | 99 ± 4                  | 108 ± 7                 | 110 ± 4                 |
| 20:3n-3       | 165 ± 8 <sup>a</sup>    | 212 ± 11 <sup>b</sup>   | 282 ± 12 <sup>c</sup>   |
| ARA (20:4n-6) | 8312 ± 191              | 9385 ± 434              | 8674 ± 401              |
| EPA (20:5n-3) | 267 ± 16                | 263 ± 33                | 207 ± 32                |
| 22:1n-9       | 86 ± 9                  | 81 ± 6                  | 109 ± 15                |
| 22:4n-6       | 2242 ± 49               | 2325 ± 116              | 2052 ± 88               |
| 22:5n-6       | 3158 ± 146 <sup>a</sup> | 467 ± 44 <sup>b</sup>   | 159 ± 12 <sup>c</sup>   |
| 24:1n-9       | 382 ± 18                | 448 ± 39                | 420 ± 22                |
| 22:5n-3       | 16 ± 1 <sup>a</sup>     | 51 ± 5 <sup>b</sup>     | 50 ± 5 <sup>b</sup>     |
| DHA (22:6n-3) | 4715 ± 163 <sup>a</sup> | 7619 ± 341 <sup>b</sup> | 7970 ± 362 <sup>b</sup> |

Data shown are means +/- SEM and are expressed in nmol/g of brain. Different letters signify the means are significantly different ( $p < 0.05$ ) measured by One-way ANOVA followed by Tukey's test for multiple comparisons or Kruskal-Wallis test followed by Dunn's multiple comparison test (if variances were significantly different).
