# Supplementary material for: Whole body synthesis rates of DHA from α-linolenic acid are greater than brain DHA accretion and uptake rates in adult rats
Source: PubMed Central journal article supplement (PMC3927474; doi:10.1194/jlr.m042275), 2014-01
Supplement: supp_M042275_jlr.M042275-7.pdf [file supp_M042275_jlr.M042275-7.pdf]

Supplementary Table 7. Brain stem fatty acid concentrations for rats fed the control, ALA or DHA diet for 15 weeks

| Fatty Acid    | Control (n=11)           | ALA (n=11)                | DHA (n=11)                |
|---------------|--------------------------|---------------------------|---------------------------|
| 14:0          | 385 ± 39                 | 366 ± 24                  | 346 ± 42                  |
| 16:0          | 21680 ± 926 <sup>a</sup> | 20463 ± 413 <sup>ab</sup> | 20092 ± 1106 <sup>b</sup> |
| 16:1n-7       | 271 ± 53                 | 394 ± 69                  | 504 ± 121                 |
| 18:0          | 27867 ± 1150             | 26673 ± 533               | 27100 ± 2378              |
| 18:1n-9       | 38598 ± 2270             | 38569 ± 972               | 37744 ± 1713              |
| 18:1n-7       | 8318 ± 278 <sup>a</sup>  | 7969 ± 153 <sup>ab</sup>  | 7521 ± 150 <sup>b</sup>   |
| 18:2n-6       | 696 ± 43 <sup>a</sup>    | 835 ± 33 <sup>b</sup>     | 1020 ± 148 <sup>b</sup>   |
| 20:0          | 1926 ± 118               | 1789 ± 98                 | 1695 ± 56                 |
| 20:1n-9       | 8088 ± 363               | 7801 ± 455                | 7599 ± 217                |
| 20:2          | 468 ± 30                 | 418 ± 18                  | 409 ± 15                  |
| 20:3n-3       | 483 ± 49                 | 470 ± 18                  | 560 ± 58                  |
| ARA (20:4n-6) | 8755 ± 339 <sup>a</sup>  | 7905 ± 255 <sup>ab</sup>  | 7219 ± 212 <sup>b</sup>   |
| EPA (20:5n-3) | 1677 ± 139               | 1564 ± 115                | 1432 ± 96                 |
| 22:1n-9       | 1324 ± 237 <sup>a</sup>  | 1773 ± 346 <sup>a</sup>   | 536 ± 17 <sup>b</sup>     |
| 22:4n-6       | 4257 ± 174 <sup>a</sup>  | 3083 ± 121 <sup>b</sup>   | 2573 ± 67 <sup>b</sup>    |
| 22:5n-6       | 3535 ± 117 <sup>a</sup>  | 172 ± 11 <sup>b</sup>     | 58 ± 2 <sup>c</sup>       |
| 24:1n-9       | 2244 ± 162               | 2230 ± 156                | 2104 ± 102                |
| 22:5n-3       | 41 ± 9 <sup>a</sup>      | 76 ± 4 <sup>ab</sup>      | 112 ± 15 <sup>b</sup>     |
| DHA (22:6n-3) | 3956 ± 112 <sup>a</sup>  | 6801 ± 378 <sup>b</sup>   | 6945 ± 315 <sup>b</sup>   |

Data shown are means +/- SEM and are expressed in nmol/g of brain. Different letters signify the means are significantly different ( $p < 0.05$ ) measured by One-way ANOVA followed by Tukey's test for multiple comparisons or Kruskal-Wallis test followed by Dunn's multiple comparison test (if variances were significantly different).
