# Supplementary material for: Whole body synthesis rates of DHA from α-linolenic acid are greater than brain DHA accretion and uptake rates in adult rats
Source: PubMed Central journal article supplement (PMC3927474; doi:10.1194/jlr.m042275), 2014-01
Supplement: supp_M042275_jlr.M042275-8.pdf [file supp_M042275_jlr.M042275-8.pdf]

Supplementary Table 8. Rest of brain fatty acid concentrations for rats fed the control, ALA or DHA diet for 15 weeks

| Fatty Acid    | Control (n=11)          | ALA (n=11)              | DHA (n=11)              |
|---------------|-------------------------|-------------------------|-------------------------|
| 14:0          | 176 ± 6                 | 189 ± 12                | 164 ± 4                 |
| 16:0          | 17626 ± 293             | 17550 ± 294             | 17183 ± 371             |
| 16:1n-7       | 229 ± 31                | 329 ± 38                | 229 ± 33                |
| 18:0          | 18727 ± 343             | 18500 ± 398             | 18106 ± 334             |
| 18:1n-9       | 18584 ± 722             | 19280 ± 661             | 19784 ± 450             |
| 18:1n-7       | 3748 ± 83               | 3718 ± 109              | 3533 ± 66               |
| 18:2n-6       | 389 ± 15 <sup>a</sup>   | 477 ± 17 <sup>b</sup>   | 556 ± 16 <sup>c</sup>   |
| 20:0          | 443 ± 21                | 469 ± 23                | 417 ± 17                |
| 20:1n-9       | 1669 ± 165              | 2074 ± 82               | 1917 ± 74               |
| 20:2          | 107 ± 7                 | 114 ± 8                 | 103 ± 6                 |
| 20:3n-3       | 212 ± 6 <sup>a</sup>    | 240 ± 12 <sup>a</sup>   | 297 ± 11 <sup>b</sup>   |
| ARA (20:4n-6) | 7227 ± 182              | 6913 ± 108              | 6653 ± 247              |
| EPA (20:5n-3) | 412 ± 17                | 442 ± 20                | 410 ± 15                |
| 22:1n-9       | 223 ± 41                | 181 ± 17                | 150 ± 7                 |
| 22:4n-6       | 2417 ± 47 <sup>a</sup>  | 2181 ± 33 <sup>b</sup>  | 1942 ± 52 <sup>c</sup>  |
| 22:5n-6       | 2481 ± 68 <sup>a</sup>  | 244 ± 17 <sup>b</sup>   | 92 ± 7 <sup>c</sup>     |
| 24:1n-9       | 594 ± 24                | 672 ± 30                | 621 ± 29                |
| 22:5n-3       | 20 ± 1 <sup>a</sup>     | 59 ± 2 <sup>b</sup>     | 73 ± 3 <sup>b</sup>     |
| DHA (22:6n-3) | 4589 ± 122 <sup>a</sup> | 6605 ± 140 <sup>b</sup> | 6984 ± 300 <sup>b</sup> |

Data shown are means +/- SEM and are expressed in nmol/g of brain. Different letters signify the means are significantly different ( $p < 0.05$ ) measured by One-way ANOVA followed by Tukey's test for multiple comparisons or Kruskal-Wallis test followed by Dunn's multiple comparison test (if variances were significantly different).
