# Supplementary material for: Whole body synthesis rates of DHA from α-linolenic acid are greater than brain DHA accretion and uptake rates in adult rats
Source: PubMed Central journal article supplement (PMC3927474; doi:10.1194/jlr.m042275), 2014-01
Supplement: supp_M042275_jlr.M042275-9.pdf [file supp_M042275_jlr.M042275-9.pdf]

**Supplementary Table 9. Cerebellum gene expression in rats fed the control, ALA and DHA diet for 15 weeks.**

| <b>Dietary Group</b>             | <b>Control</b>         | <b>ALA</b>               | <b>DHA</b>                |
|----------------------------------|------------------------|--------------------------|---------------------------|
| b actin                          | 1 ± 0.12 <sup>ab</sup> | 1.10 ± 0.08 <sup>a</sup> | 0.98 ± 0.08 <sup>b</sup>  |
| 15 LOX                           | 1 ± 0.61               | 0.63 ± 0.30              | 1.35 ± 1.00               |
| BDNF                             | 1 ± 0.22               | 0.98 ± 0.17              | 0.88 ± 0.22               |
| DR D2                            | 1 ± 0.21               | 1.13 ± 0.34              | 1.09 ± 0.35               |
| EGFR                             | 1 ± 0.16 <sup>a</sup>  | 1.26 ± 0.10 <sup>b</sup> | 0.96 ± 0.30 <sup>a</sup>  |
| HO1                              | 1 ± 0.17 <sup>a</sup>  | 1.21 ± 0.14 <sup>b</sup> | 0.99 ± 0.22 <sup>a</sup>  |
| sPLA2                            | 1 ± 0.77               | 0.86 ± 0.56              | 0.98 ± 0.72               |
| cPLA2                            | 1 ± 0.14               | 1.17 ± 0.25              | 0.98 ± 0.21               |
| iPLA2                            | 1 ± 0.15               | 1.02 ± 0.12              | 1.00 ± 0.14               |
| PPAR <sub>g</sub>                | 1 ± 0.13               | 1.17 ± 0.24              | 1.07 ± 0.23               |
| PGES3                            | 1 ± 0.24               | 1.09 ± 0.25              | 0.97 ± 0.12               |
| COX 2                            | 1 ± 0.33 <sup>a</sup>  | 1.46 ± 0.42 <sup>b</sup> | 1.41 ± 0.32 <sup>ab</sup> |
| RAR <sub>a</sub>                 | 1 ± 0.23               | 1.07 ± 0.19              | 1.08 ± 0.18               |
| RXR <sub>a</sub>                 | 1 ± 0.12 <sup>a</sup>  | 1.15 ± 0.12 <sup>b</sup> | 0.98 ± 0.14 <sup>a</sup>  |
| RXR <sub>b</sub>                 | 1 ± 0.14               | 1.04 ± 0.13              | 0.96 ± 0.15               |
| SNC <sub>a</sub>                 | 1 ± 0.14               | 0.96 ± 0.11              | 0.84 ± 0.21               |
| TH                               | 1 ± 1.50               | 1.60 ± 2.39              | 1.23 ± 1.64               |
| TIA1                             | 1 ± 0.15               | 0.99 ± 0.11              | 0.98 ± 0.13               |
| TNF <sub>a</sub> R1 <sub>a</sub> | 1 ± 0.11               | 1.12 ± 0.17              | 0.96 ± 0.16               |
| TTR                              | 1 ± 0.73 <sup>a</sup>  | 1.75 ± 0.42 <sup>b</sup> | 0.72 ± 0.77 <sup>a</sup>  |
| UCP2                             | 1 ± 0.20 <sup>ab</sup> | 1.17 ± 0.10 <sup>a</sup> | 0.87 ± 0.14 <sup>b</sup>  |

Data are expressed as mean RQ ± SD. Different letters signify the means are significantly different (p<0.05) measured by One-way ANOVA followed by Tukey's test for multiple comparisons or Kruskal-Wallis test followed by Dunn's multiple comparison test (if variances were significantly different).
