# Supplementary material for: Whole body synthesis rates of DHA from α-linolenic acid are greater than brain DHA accretion and uptake rates in adult rats
Source: PubMed Central journal article supplement (PMC3927474; doi:10.1194/jlr.m042275), 2014-01
Supplement: supp_M042275_jlr.M042275-10.pdf [file supp_M042275_jlr.M042275-10.pdf]

**Supplementary Table 10. Cortex gene expression in rats fed the control, ALA and DHA diet for 15 weeks.**

| <b>Dietary Group</b> | <b>Control</b> | <b>ALA</b>  | <b>DHA</b>  |
|----------------------|----------------|-------------|-------------|
| b actin              | 1 ± 0.15       | 1.05 ± 0.16 | 1.05 ± 0.22 |
| 15 LOX               | 1 ± 0.28       | 0.77 ± 0.28 | 1.04 ± 0.40 |
| BDNF                 | 1 ± 0.33       | 1.03 ± 0.33 | 1.16 ± 0.24 |
| DR D2                | 1 ± 1.48       | 1.11 ± 1.01 | 1.12 ± 0.82 |
| EGFR                 | 1 ± 0.21       | 0.94 ± 0.17 | 0.99 ± 0.21 |
| HO1                  | 1 ± 0.18       | 1.05 ± 0.24 | 1.11 ± 0.26 |
| spla2                | 1 ± 0.56       | 0.85 ± 0.49 | 1.17 ± 0.58 |
| cPLA2                | 1 ± 0.20       | 0.93 ± 0.19 | 1.11 ± 0.30 |
| iPLA2                | 1 ± 0.17       | 0.92 ± 0.19 | 1.09 ± 0.21 |
| PPARg                | 1 ± 0.57       | 1.21 ± 0.62 | 1.36 ± 0.59 |
| PGES3                | 1 ± 0.32       | 0.91 ± 0.35 | 1.07 ± 0.42 |
| COX 2                | 1 ± 0.26       | 1.17 ± 0.43 | 1.29 ± 0.40 |
| RAR a                | 1 ± 0.39       | 1.03 ± 0.41 | 1.20 ± 0.30 |
| RXR a                | 1 ± 0.19       | 1.02 ± 0.18 | 1.03 ± 0.21 |
| RXR b                | 1 ± 0.14       | 1.02 ± 0.28 | 1.05 ± 0.20 |
| SNCa                 | 1 ± 0.12       | 1.08 ± 0.15 | 1.15 ± 0.18 |
| TH                   | 1 ± 0.31       | 1.56 ± 1.70 | 1.11 ± 0.24 |
| TIA1                 | 1 ± 0.26       | 0.98 ± 0.23 | 1.06 ± 0.27 |
| TNFaR1a              | 1 ± 0.28       | 1.11 ± 0.20 | 1.10 ± 0.25 |
| TTR                  | 1 ± 1.71       | 0.75 ± 0.97 | 1.49 ± 2.94 |
| UCP2                 | 1 ± 0.20       | 1.04 ± 0.19 | 1.02 ± 0.22 |

Data are expressed as mean RQ ± SD. Different letters signify the means are significantly different (p<0.05) measured by One-way ANOVA followed by Tukey's test for multiple comparisons or Kruskal-Wallis test followed by Dunn's multiple comparison test (if variances were significantly different).
