# Supplementary material for: Whole body synthesis rates of DHA from α-linolenic acid are greater than brain DHA accretion and uptake rates in adult rats
Source: PubMed Central journal article supplement (PMC3927474; doi:10.1194/jlr.m042275), 2014-01
Supplement: supp_M042275_jlr.M042275-11.pdf [file supp_M042275_jlr.M042275-11.pdf]

**Supplementary Table 11. Brainstem gene expression in rats fed the control, ALA and DHA diet for 15 weeks.**

| <b>Dietary Group</b>             | <b>Control</b>         | <b>ALA</b>               | <b>DHA</b>               |
|----------------------------------|------------------------|--------------------------|--------------------------|
| b-actin                          | 1 ± 0.21               | 1.11 ± 0.27              | 1.10 ± 0.35              |
| 15 LOX                           | 1 ± 0.49 <sup>ab</sup> | 0.91 ± 0.59 <sup>a</sup> | 1.68 ± 0.88 <sup>b</sup> |
| BDNF                             | 1 ± 0.38               | 0.72 ± 0.28              | 1.19 ± 0.72              |
| DR D2                            | 1 ± 0.32               | 0.96 ± 0.20              | 0.88 ± 0.39              |
| EGFR                             | 1 ± 0.24               | 1.05 ± 0.23              | 1.14 ± 0.63              |
| HO1                              | 1 ± 0.16               | 1.01 ± 0.19              | 0.99 ± 0.21              |
| sPLA2                            | 1 ± 0.71               | 0.72 ± 0.67              | 1.10 ± 0.77              |
| cPLA2                            | 1 ± 0.21               | 0.98 ± 0.19              | 6.22 ± 16.96             |
| iPLA2                            | 1 ± 0.24               | 0.89 ± 0.20              | 1.10 ± 0.38              |
| PPAR <sub>g</sub>                | 1 ± 0.43               | 0.91 ± 0.36              | 1.11 ± 0.60              |
| PGES3                            | 1 ± 0.19               | 1.14 ± 0.38              | 1.10 ± 0.27              |
| COX 2                            | 1 ± 0.31               | 0.87 ± 0.30              | 3.34 ± 6.43              |
| RAR <sub>a</sub>                 | 1 ± 0.21               | 1.00 ± 0.38              | 1.52 ± 0.96              |
| RXR <sub>a</sub>                 | 1 ± 0.18               | 0.99 ± 0.16              | 1.02 ± 0.22              |
| RXR <sub>b</sub>                 | 1 ± 0.26               | 1.15 ± 0.19              | 1.29 ± 0.44              |
| VMAT2                            | 1 ± 0.35               | 1.34 ± 0.73              | 9.94 ± 27.63             |
| SNC <sub>a</sub>                 | 1 ± 0.23 <sup>ab</sup> | 0.95 ± 0.18 <sup>a</sup> | 2.25 ± 3.24 <sup>b</sup> |
| TH                               | 1 ± 0.34               | 1.24 ± 0.64              | 0.98 ± 0.76              |
| TIA1                             | 1 ± 0.22 <sup>ab</sup> | 0.86 ± 0.30 <sup>a</sup> | 1.61 ± 1.34 <sup>b</sup> |
| TNF <sub>a</sub> R1 <sub>a</sub> | 1 ± 0.24               | 1.30 ± 0.63              | 1.21 ± 0.44              |
| TTR                              | 1 ± 2.01               | 0.93 ± 1.42              | 0.46 ± 0.72              |
| UCP2                             | 1 ± 0.19               | 1.05 ± 0.30              | 1.08 ± 0.30              |

Data are expressed as mean RQ ± SD. Different letters signify the means are significantly different (p<0.05) measured by One-way ANOVA followed by Tukey's test for multiple comparisons or Kruskal-Wallis test followed by Dunn's multiple comparison test (if variances were significantly different).
