# Supplementary material for: Whole body synthesis rates of DHA from α-linolenic acid are greater than brain DHA accretion and uptake rates in adult rats
Source: PubMed Central journal article supplement (PMC3927474; doi:10.1194/jlr.m042275), 2014-01
Supplement: supp_M042275_jlr.M042275-12.pdf [file supp_M042275_jlr.M042275-12.pdf]

**Supplementary Table 12. Hippocampus gene expression in rats fed the control, ALA and DHA diet for 15 weeks.**

| <b>Dietary Group</b> | <b>Control</b> | <b>ALA</b>   | <b>DHA</b>  |
|----------------------|----------------|--------------|-------------|
| B-actin              | 1 ± 0.16       | 1.13 ± 0.15  | 1.12 ± 0.22 |
| 15 LOX               | 1 ± 0.34       | 0.74 ± 0.45  | 0.96 ± 0.67 |
| BDNF                 | 1 ± 0.18       | 1.03 ± 0.22  | 1.13 ± 0.16 |
| DR D2                | 1 ± 0.41       | 1.27 ± 1.18  | 0.95 ± 0.52 |
| EGFR                 | 1 ± 0.09       | 1.10 ± 0.19  | 1.04 ± 0.22 |
| HO1                  | 1 ± 0.13       | 1.01 ± 0.23  | 1.03 ± 0.24 |
| sPLA2                | 1 ± 0.38       | 1.08 ± 0.61  | 0.93 ± 0.50 |
| cPLA2                | 1 ± 0.36       | 1.10 ± 0.24  | 0.98 ± 0.23 |
| iPLA2                | 1 ± 0.10       | 1.02 ± 0.15  | 1.05 ± 0.18 |
| PPAR $\gamma$        | 1 ± 0.73       | 0.47 ± 0.33  | 0.47 ± 0.22 |
| PGES3                | 1 ± 0.20       | 1.00 ± 0.19  | 1.11 ± 0.22 |
| COX 2                | 1 ± 0.34       | 1.15 ± 0.25  | 1.12 ± 0.25 |
| RAR a                | 1 ± 0.33       | 0.96 ± 0.27  | 0.97 ± 0.19 |
| RXR a                | 1 ± 0.17       | 1.08 ± 0.19  | 1.10 ± 0.14 |
| RXR b                | 1 ± 0.15       | 0.97 ± 0.22  | 1.07 ± 0.17 |
| VMAT 2               | 1 ± 1.43       | 0.84 ± 0.70  | 1.26 ± 1.73 |
| SNCa                 | 1 ± 0.21       | 1.10 ± 0.21  | 1.19 ± 0.18 |
| TH                   | 1 ± 0.32       | 1.15 ± 0.70  | 1.01 ± 0.41 |
| TIA1                 | 1 ± 0.15       | 1.09 ± 0.24  | 1.08 ± 0.25 |
| TNFa R 1a            | 1 ± 0.20       | 1.14 ± 0.22  | 0.99 ± 0.26 |
| TTR                  | 1 ± 1.91       | 6.67 ± 10.18 | 2.40 ± 2.88 |
| UCP2                 | 1 ± 0.21       | 1.26 ± 0.29  | 1.07 ± 0.34 |

Data are expressed as mean RQ  $\pm$  SD. Different letters signify the means are significantly different ( $p < 0.05$ ) measured by One-way ANOVA followed by Tukey's test for multiple comparisons or Kruskal-Wallis test followed by Dunn's multiple comparison test (if variances were significantly different).
