# Supplementary material for: Whole body synthesis rates of DHA from α-linolenic acid are greater than brain DHA accretion and uptake rates in adult rats
Source: PubMed Central journal article supplement (PMC3927474; doi:10.1194/jlr.m042275), 2014-01
Supplement: supp_M042275_jlr.M042275-13.pdf [file supp_M042275_jlr.M042275-13.pdf]

**Supplementary Table 13. Striatum gene expression in rats fed the control, ALA and DHA diet for 15 weeks.**

| <b>Dietary Group</b>     | <b>Control</b> |                      | <b>ALA</b> |                     | <b>DHA</b> |                     |
|--------------------------|----------------|----------------------|------------|---------------------|------------|---------------------|
| b actin                  | 1              | ± 0.11               | 1.04       | ± 0.13              | 0.92       | ± 0.13              |
| 15 LOX                   | 1              | ± 0.59               | 1.00       | ± 0.69              | 1.46       | ± 0.95              |
| BDNF                     | 1              | ± 1.10               | 1.01       | ± 0.80              | 2.10       | ± 1.98              |
| DR D2                    | 1              | ± 0.24               | 1.20       | ± 0.24              | 0.98       | ± 0.29              |
| EGFR                     | 1              | ± 0.27               | 1.00       | ± 0.24              | 0.82       | ± 0.22              |
| HO1                      | 1              | ± 0.18               | 1.09       | ± 0.21              | 0.94       | ± 0.12              |
| sPLA2                    | 1              | ± 0.41               | 0.46       | ± 0.39              | 0.68       | ± 0.65              |
| cPLA2                    | 1              | ± 0.39               | 1.04       | ± 0.19              | 0.92       | ± 0.21              |
| iPLA2                    | 1              | ± 0.14               | 0.96       | ± 0.18              | 0.90       | ± 0.17              |
| PPAR $\alpha$            | 1              | ± 1.52               | 0.90       | ± 0.38              | 0.83       | ± 0.64              |
| PGES3                    | 1              | ± 0.65               | 0.95       | ± 0.69              | 0.92       | ± 0.64              |
| COX 2                    | 1              | ± 0.23 <sup>ab</sup> | 1.04       | ± 0.30 <sup>a</sup> | 0.75       | ± 0.17 <sup>b</sup> |
| RAR $\alpha$             | 1              | ± 0.24               | 0.93       | ± 0.22              | 0.93       | ± 0.24              |
| RXR $\alpha$             | 1              | ± 0.22               | 1.14       | ± 0.14              | 1.02       | ± 0.21              |
| RXR $\beta$              | 1              | ± 0.17               | 1.10       | ± 0.18              | 1.02       | ± 0.25              |
| SNC $\alpha$             | 1              | ± 0.13               | 1.05       | ± 0.14              | 0.97       | ± 0.13              |
| TH                       | 1              | ± 0.50               | 1.12       | ± 0.26              | 1.19       | ± 0.31              |
| TIA1                     | 1              | ± 0.14               | 1.01       | ± 0.24              | 0.89       | ± 0.19              |
| TNF $\alpha$ R1 $\alpha$ | 1              | ± 0.22               | 0.98       | ± 0.22              | 0.88       | ± 0.26              |
| TTR                      | 1              | ± 1.37               | 2.37       | ± 4.92              | 0.66       | ± 0.77              |
| UCP2                     | 1              | ± 0.16               | 1.09       | ± 0.23              | 1.00       | ± 0.24              |

Data are expressed as mean RQ  $\pm$  SD. Different letters signify the means are significantly different ( $p < 0.05$ ) measured by One-way ANOVA followed by Tukey's test for multiple comparisons or Kruskal-Wallis test followed by Dunn's multiple comparison test (if variances were significantly different).
