# Supplementary material for: Whole body synthesis rates of DHA from α-linolenic acid are greater than brain DHA accretion and uptake rates in adult rats
Source: PubMed Central journal article supplement (PMC3927474; doi:10.1194/jlr.m042275), 2014-01
Supplement: supp_M042275_jlr.M042275-14.pdf [file supp_M042275_jlr.M042275-14.pdf]

**Supplementary Table 14. Rest of brain gene expression in rats fed the control, ALA and DHA diet for 15 weeks.**

| <b>Dietary Group</b> | <b>Control</b> |                      | <b>ALA</b> |                     | <b>DHA</b> |                     |
|----------------------|----------------|----------------------|------------|---------------------|------------|---------------------|
| b actin              | 1              | ± 0.07               | 1.00       | ± 0.11              | 1.08       | ± 0.34              |
| 15 LOX               | 1              | ± 1.56               | 0.62       | ± 1.37              | 1.07       | ± 1.39              |
| BDNF                 | 1              | ± 0.31               | 0.99       | ± 0.46              | 0.99       | ± 0.25              |
| DR D2                | 1              | ± 0.22               | 1.00       | ± 0.16              | 1.05       | ± 0.38              |
| EGFR                 | 1              | ± 0.10               | 1.06       | ± 0.14              | 1.08       | ± 0.36              |
| HO1                  | 1              | ± 0.15               | 1.00       | ± 0.13              | 1.04       | ± 0.27              |
| sPLA2                | 1              | ± 0.43 <sup>ab</sup> | 0.67       | ± 0.36 <sup>a</sup> | 1.17       | ± 0.50 <sup>b</sup> |
| cPLA2                | 1              | ± 0.15               | 0.85       | ± 0.21              | 0.99       | ± 0.32              |
| iPLA2                | 1              | ± 0.15               | 0.95       | ± 0.15              | 1.10       | ± 0.43              |
| PPARg                | 1              | ± 0.33               | 1.18       | ± 0.31              | 1.14       | ± 0.51              |
| PGES3                | 1              | ± 0.19               | 0.99       | ± 0.20              | 1.14       | ± 0.26              |
| COX 2                | 1              | ± 0.32               | 0.92       | ± 0.30              | 1.21       | ± 0.73              |
| RAR a                | 1              | ± 0.08               | 0.91       | ± 0.14              | 1.09       | ± 0.46              |
| RXR a                | 1              | ± 0.10               | 1.05       | ± 0.10              | 1.17       | ± 0.37              |
| RXR b                | 1              | ± 0.13               | 0.91       | ± 0.07              | 1.12       | ± 0.58              |
| VMAT2                | 1              | ± 0.30               | 1.12       | ± 0.22              | 1.08       | ± 0.38              |
| SNCa                 | 1              | ± 0.12               | 0.97       | ± 0.15              | 1.09       | ± 0.40              |
| TH                   | 1              | ± 0.18               | 1.09       | ± 0.20              | 1.18       | ± 0.67              |
| TIA1                 | 1              | ± 0.13               | 0.97       | ± 0.16              | 1.08       | ± 0.22              |
| TNFaR1a              | 1              | ± 0.11               | 0.95       | ± 0.13              | 1.06       | ± 0.54              |
| TTR                  | 1              | ± 0.42               | 0.71       | ± 0.43              | 1.08       | ± 0.64              |
| UCP2                 | 1              | ± 0.10               | 0.97       | ± 0.15              | 1.20       | ± 0.81              |

Data are expressed as mean RQ ± SD. Different letters signify the means are significantly different (p<0.05) measured by One-way ANOVA followed by Tukey's test for multiple comparisons or Kruskal-Wallis test followed by Dunn's multiple comparison test (if variances were significantly different).
