# Supplementary material for: Whole body synthesis rates of DHA from α-linolenic acid are greater than brain DHA accretion and uptake rates in adult rats
Source: PubMed Central journal article supplement (PMC3927474; doi:10.1194/jlr.m042275), 2014-01
Supplement: supp_M042275_jlr.M042275-15.pdf [file supp_M042275_jlr.M042275-15.pdf]

Supplementary Table 15. Plasma unesterified fatty acid concentrations for rats fed the control, ALA or DHA diet for 15 weeks

| Fatty Acid    | Control (n=3)          | ALA (n=6)              | DHA (n=5)               |
|---------------|------------------------|------------------------|-------------------------|
| 14:0          | 51 ± 15                | 15 ± 3                 | 69 ± 24                 |
| 16:0          | 287 ± 50 <sup>ab</sup> | 183 ± 33 <sup>a</sup>  | 744 ± 138 <sup>b</sup>  |
| 16:1n-7       | 35 ± 9 <sup>ab</sup>   | 24 ± 5 <sup>a</sup>    | 119 ± 26 <sup>b</sup>   |
| 18:0          | 169 ± 10               | 128 ± 31               | 220 ± 28                |
| 18:1n-9       | 157 ± 48 <sup>ab</sup> | 104 ± 24 <sup>a</sup>  | 500 ± 99 <sup>b</sup>   |
| 18:1n-7       | 43 ± 15 <sup>ab</sup>  | 29 ± 7 <sup>a</sup>    | 118 ± 28 <sup>b</sup>   |
| 18:2n-6       | 153 ± 39 <sup>ab</sup> | 106 ± 23 <sup>a</sup>  | 408 ± 97.3 <sup>b</sup> |
| 18:3n-6       | 1 ± 0.4 <sup>ab</sup>  | 1 ± 0.1 <sup>a</sup>   | 2 ± 0.6 <sup>b</sup>    |
| 18:3n-3       | 1 ± 0.3 <sup>a</sup>   | 7 ± 1.6 <sup>b</sup>   | 4 ± 0.9 <sup>ab</sup>   |
| 20:0          | 2 ± 0.2                | 2 ± 0.5                | 3 ± 0.5                 |
| 20:1n-9       | 3 ± 1.3                | 9 ± 5.3                | 7 ± 2                   |
| 20:2n-6       | 2 ± 0.5 <sup>ab</sup>  | 1.7 ± 0.4 <sup>a</sup> | 6 ± 2 <sup>b</sup>      |
| 20:3n-3       | 7 ± 3                  | 8 ± 3                  | 15 ± 6                  |
| ARA (20:4n-6) | 26 ± 7                 | 15 ± 3.2               | 35 ± 8                  |
| EPA (20:5n-3) | 5 ± 3                  | 3 ± 1.7                | 5 ± 2                   |
| 22:1n-9       | 48 ± 42                | 11 ± 4.3               | 8 ± 1                   |
| 22:4n-6       | 4 ± 1                  | 2.0 ± 0.4              | 5 ± 1.8                 |
| 22:5n-6       | 5 ± 1.6 <sup>a</sup>   | 1 ± 0.3 <sup>b</sup>   | 2 ± 0.2 <sup>ab</sup>   |
| 24:1n-9       | 3 ± 1                  | 4 ± 2                  | 6 ± 2                   |
| 22:5n-3       | 3 ± 2.9                | 3 ± 2                  | 5 ± 2                   |
| DHA (22:6n-3) | 1 ± 0.3 <sup>a</sup>   | 4 ± 0.9 <sup>ab</sup>  | 65 ± 21 <sup>b</sup>    |

Data shown are means +/- SEM and are expressed in nmol/ml of plasma. Different letters signify the means are significantly different (p<0.05) measured by Kruskal-Wallis test followed by Dunn's test for multiple comparisons.
