# Supplementary material for: Whole body synthesis rates of DHA from α-linolenic acid are greater than brain DHA accretion and uptake rates in adult rats
Source: PubMed Central journal article supplement (PMC3927474; doi:10.1194/jlr.m042275), 2014-01
Supplement: supp_M042275_jlr.M042275-16.pdf [file supp_M042275_jlr.M042275-16.pdf]

Supplementary Table 16. Plasma esterified fatty acid concentrations for rats fed the control, ALA or DHA diet for 15 weeks

| Fatty Acid    | Control (n=3)         | ALA (n=6)              | DHA (n=5)             |
|---------------|-----------------------|------------------------|-----------------------|
| 14:0          | 80 ± 21               | 85 ± 31                | 52 ± 9                |
| 16:0          | 880 ± 568             | 1485 ± 223             | 1550 ± 252            |
| 16:1n-7       | 102 ± 30              | 121 ± 28               | 98 ± 22               |
| 18:0          | 1715 ± 450            | 1348 ± 170             | 1617 ± 368            |
| 18:1n-9       | 333 ± 79              | 434 ± 145              | 404 ± 92              |
| 18:1n-7       | 164 ± 53              | 203 ± 32               | 139 ± 27              |
| 18:2n-6       | 1065 ± 275            | 971 ± 114              | 1111 ± 224            |
| 18:3n-6       | 11 ± 3                | 7 ± 1                  | 6 ± 2                 |
| 18:3n-3       | 1 ± 0.4 <sup>a</sup>  | 12 ± 7 <sup>b</sup>    | 2 ± 0.5 <sup>ab</sup> |
| 20:0          | 6 ± 2                 | 9 ± 2                  | 7 ± 2                 |
| 20:1n-9       | 8 ± 5                 | 16 ± 7                 | 8 ± 4                 |
| 20:2n-6       | 15 ± 4                | 17 ± 2                 | 17 ± 4                |
| 20:3n-3       | 58 ± 21               | 60 ± 8                 | 118 ± 26              |
| ARA (20:4n-6) | 2708 ± 671            | 1978 ± 259             | 1934 ± 589            |
| EPA (20:5n-3) | 17 ± 4                | 14 ± 2                 | 33 ± 13               |
| 22:1n-9       | 25 ± 14               | 24 ± 10                | 16 ± 4                |
| 22:4n-6       | 33 ± 8 <sup>a</sup>   | 18 ± 4 <sup>ab</sup>   | 9 ± 2 <sup>b</sup>    |
| 22:5n-6       | 230 ± 46 <sup>a</sup> | 23 ± 3 <sup>ab</sup>   | 6 ± 2 <sup>b</sup>    |
| 24:1n-9       | 18 ± 6                | 22 ± 6                 | 30 ± 16               |
| 22:5n-3       | 4 ± 1.1 <sup>a</sup>  | 24 ± 7 <sup>b</sup>    | 15 ± 4 <sup>ab</sup>  |
| DHA (22:6n-3) | 73 ± 19 <sup>a</sup>  | 208 ± 23 <sup>ab</sup> | 396 ± 92 <sup>b</sup> |

Data shown are means +/- SEM and are expressed in nmol/ml of plasma. Different letters signify the means are significantly different (p<0.05) measured by Kruskal-Wallis test followed by Dunn's test for multiple comparisons.
